# Supplementary material for: Molecular benchmarks of a SARS-CoV-2 epidemic
Source: PubMed Central journal article supplement (PMC8206085; doi:10.1038/s41467-021-23883-6), 2021-06-15
Supplement: 41467_2021_23883_MOESM3_ESM.pdf [file 41467_2021_23883_MOESM3_ESM.pdf]

## Descriptions of Additional Supplementary Files

### **Supplementary data 1**

**Description:** Primers used for PCR amplification of viral cDNA for sequencing.

### **Supplementary data 2**

**Description:** Illumina indexes used in sequencing.

### **Supplementary data 3**

**Description:** The accession number of the GISAID sequences used for the comparative analysis.
