# Supplementary material for: Molecular benchmarks of a SARS-CoV-2 epidemic
Source: Nat Commun. 2021 Jun 15;12:3633. doi: 10.1038/s41467-021-23883-6 (PMC8206085; doi:10.1038/s41467-021-23883-6)
Supplement: Supplementary file 1 — Supplementary Information with tables. [file 41467_2021_23883_MOESM1_ESM.pdf]

## Supplementary Information

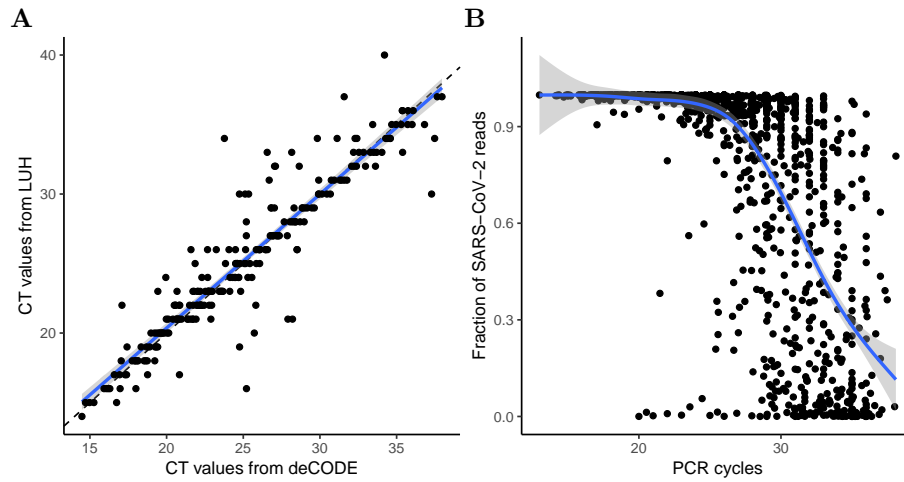

**Supplementary Figure 1: Different measures of viral load.**

**A**, CT values from LUH against CT values from deCODE. Subset of the samples (238) were measured both by LUH and deCODE. **B**, Fraction of reads mapping to SARS-CoV-2 against the aggregated CT values. The error bands are 95%-CIs and the centre in the bands are means from the regressions.

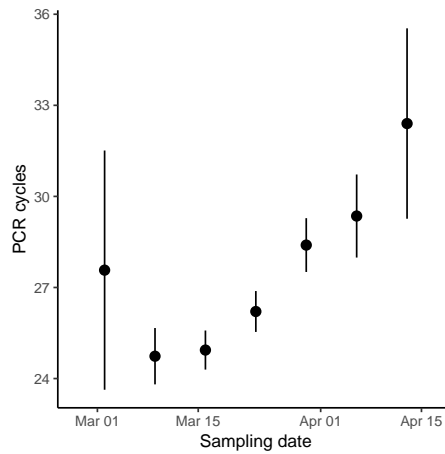

**Supplementary Figure 2: qPCR-CT values as function of sampling date in the Australian data.**

The centre values are means and the error bars are 95%-CIs. The number of samples in the bins are 7, 72, 252, 303, 194, 65 and 5 ordered by date.

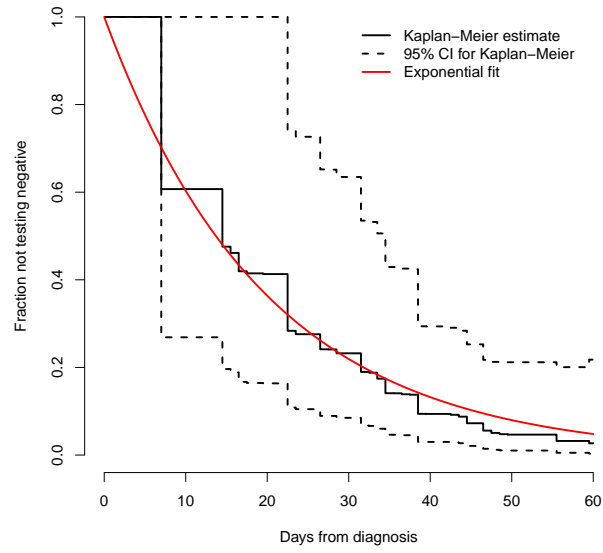

**Supplementary Figure 3: Molecular traces of SARS-CoV-2 recovery with indeterminable samples.** The fraction of individuals that remained positive as a function of days from the initial positive test.

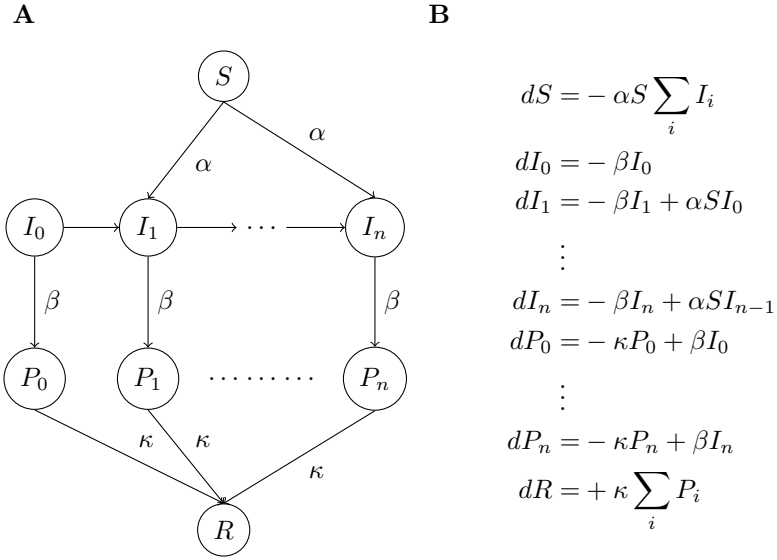

**Supplementary Figure 4: Ordinary differential equations of the susceptible, infected, positive and recovered epidemiological model.**

**A**, schematic view of the flow of individuals in the epidemiological model. The susceptible individuals are infected by individuals in different infection generations ( $I_0 \dots I_n$ ). These individuals then recover from the symptoms but test positive ( $P_0 \dots P_n$ ). In the final stage, the positive individuals transition to the recovered and negative state. **B**, Ordinary differential equations. The infected and positive states are broken by the generation of the virus transmission to keep track of the viral generations

**Supplementary Table 1: Example of a serial dilution of a positive sample**

A synthetic RNA control (TaqPath control) is provided by the manufacturer at a concentration of 25 copies/ $\mu\text{L}$ . A serial dilution of the control shows that the detection limit in our assay setup is between approximately 1 and 6 copies of RNA. A serial dilution of a positive sample with a measured Ct value of 20.6, shows that this sample would still be determined positive after a 100,000X dilution (Ct = 35.8).

|                                  |                |        |  |
|----------------------------------|----------------|--------|--|
| TaqPath qPCR assay               |                |        |  |
| Assay volume: 6.25 $\mu\text{L}$ |                |        |  |
| RNA input: 2.5 $\mu\text{L}$     |                |        |  |
|                                  | Ct-value       |        |  |
| Sample 1                         | 20.6           |        |  |
| 10X dilution                     | 23.7           |        |  |
| 100X dilution                    | 27.9           |        |  |
| 1,000x dilution                  | 31.6           |        |  |
| 10,000X dilution                 | 33.4           |        |  |
| 100,000X dilution                | 35.8           |        |  |
|                                  |                |        |  |
|                                  | Ct-value       | Copies |  |
| TaqPath-Control                  | 30.7           | 62.5   |  |
| 10X dilution                     | 34.7           | 6.25   |  |
| 100X dilution                    | Not determined | 0.625  |  |
